# Supplementary material for: Gut Microbiota of Apis mellifera at Selected Ontogenetic Stages and Their Immunogenic Potential during Summer
Source: MDPI journal article supplement (doi:10.3390/pathogens13020122), 2024-01-28
Supplement: s1 [file s1]

| Sample-id            | Input  | Filtered | Percentage of input passed filter | Denoisied | Merged | Percentage of input merged | Nonchimeric | Percentage of input nonchimeric |
|----------------------|--------|----------|-----------------------------------|-----------|--------|----------------------------|-------------|---------------------------------|
| 5th stage larva1     | 105397 | 81009    | 76.86                             | 80923     | 69747  | 66.18                      | 10478       | 9.94                            |
| 5th stage larva2     | 86041  | 59373    | 69.01                             | 59241     | 50206  | 58.35                      | 4406        | 5.12                            |
| Freshly emerged bee1 | 90955  | 57467    | 63.18                             | 57405     | 57120  | 62.8                       | 10371       | 11.4                            |
| Freshly emerged bee2 | 84116  | 55308    | 65.75                             | 55200     | 54790  | 65.14                      | 10059       | 11.96                           |
| Freshly emerged bee3 | 77253  | 57566    | 74.52                             | 57216     | 56169  | 72.71                      | 3898        | 5.05                            |
| Nurse bee1           | 110258 | 82005    | 74.38                             | 80826     | 76050  | 68.97                      | 7063        | 6.41                            |
| Nurse bee2           | 117463 | 88331    | 75.2                              | 86883     | 79889  | 68.01                      | 7634        | 6.5                             |
| Nurse bee3           | 119125 | 88132    | 73.98                             | 86597     | 79177  | 66.47                      | 6560        | 5.51                            |
| Forager bee1         | 113475 | 86321    | 76.07                             | 84946     | 78551  | 69.22                      | 8208        | 7.23                            |
| Forager bee2         | 105013 | 78836    | 75.07                             | 77438     | 71693  | 68.27                      | 6890        | 6.56                            |
| Forager bee3         | 104392 | 80963    | 77.56                             | 79507     | 72649  | 69.59                      | 6957        | 6.66                            |

**Table S2.** Raw read sequence per each sample. This include their input size, denoisied sequenced and size of non-chimeric sequence.
